# Supplementary material for: Simple Application and Adherence to Gout Guidelines Enables Disease Control: An Observational Study in French Referral Centres
Source: MDPI journal article supplement (doi:10.3390/jcm11195742), 2022-09-28
Supplement: s1 [file s1]

**Table S1:** Patient baseline characteristics, per centre.

| Baseline characteristics                                                                       |                                             | Bichat <sup>a</sup> |             | Lariboisière <sup>a</sup> |            | Saint Philibert <sup>a</sup> |  |
|------------------------------------------------------------------------------------------------|---------------------------------------------|---------------------|-------------|---------------------------|------------|------------------------------|--|
| Demographics                                                                                   |                                             |                     |             |                           |            |                              |  |
| Male                                                                                           | 71 (71%)                                    | 0                   | 89 (89%)    | 0                         | 83 (83%)   | 0                            |  |
| Age at inclusion (years)                                                                       | 65.4 ± 13.1                                 | 0                   | 57.1 ± 16.5 | 0                         | 65 ± 14.9  | 0                            |  |
| Body mass index (kg/m <sup>2</sup> )                                                           | 28.3 ± 5.6                                  | 17                  | 27.3 ± 4.3  | 25                        | 28 ± 4.7   | 11                           |  |
| Ethnicity                                                                                      |                                             | 0                   |             | 9                         |            | 0                            |  |
|                                                                                                | Caucasian                                   | 38 (38%)            | 43 (47.3%)  |                           | 82 (82%)   |                              |  |
|                                                                                                | North African                               | 20 (20%)            | 19 (20.9%)  |                           | 10 (10%)   |                              |  |
|                                                                                                | Sub Saharan African                         | 29 (29%)            | 15 (16.5%)  |                           | 4 (4%)     |                              |  |
|                                                                                                | Southeast Asian                             | 7 (7%)              | 5 (5.5%)    |                           | 3 (3%)     |                              |  |
|                                                                                                | Middle East                                 | 0 (0%)              | 2 (2.2%)    |                           | 0 (0%)     |                              |  |
|                                                                                                | Others                                      | 6 (6%)              | 7 (7.7%)    |                           | 1 (1%)     |                              |  |
| Socio-economic status                                                                          |                                             | 3                   |             | 23                        |            | 12                           |  |
|                                                                                                | Manager                                     | 0 (0%)              | 7 (9.1%)    |                           | 7 (8%)     |                              |  |
|                                                                                                | Academic profession                         | 8 (8.2%)            | 18 (23.4%)  |                           | 13 (14.8%) |                              |  |
|                                                                                                | Worker, farmer                              | 14 (14.4%)          | 9 (11.7%)   |                           | 12 (13.6%) |                              |  |
|                                                                                                | Unemployed                                  | 8 (8.2%)            | 4 (5.2%)    |                           | 1 (1.1%)   |                              |  |
|                                                                                                | Home keeper, retired, disabled              | 67 (69.1%)          | 39 (50.6%)  |                           | 55 (62.5%) |                              |  |
| Beverage intake                                                                                |                                             | 0                   |             | 1                         |            | 0                            |  |
|                                                                                                | No beverage consumption                     | 75 (75%)            | 61 (61.6%)  |                           | 58 (58%)   |                              |  |
|                                                                                                | Current alcoholic intoxication <sup>b</sup> | 15 (15%)            | 15 (15.2%)  |                           | 25 (25%)   |                              |  |
|                                                                                                | Former alcoholic intoxication               | 8 (8%)              | 7 (7.1%)    |                           | 11 (11%)   |                              |  |
| Current excessive sweetened beverage intake <sup>c</sup>                                       | 1 (1%)                                      |                     | 3 (3%)      |                           | 3 (3%)     |                              |  |
| Former excessive sweetened beverage intake                                                     | 0 (0%)                                      |                     | 3 (3%)      |                           | 0 (0%)     |                              |  |
| Current alcoholic intoxication and excessive sweetened beverage intake                         | 1 (1%)                                      |                     | 9 (9.1%)    |                           | 3 (3%)     |                              |  |
| Former alcoholic intoxication and excessive sweetened beverage intake                          | 0 (0%)                                      |                     | 1 (1%)      |                           | 0 (0%)     |                              |  |
| Smoking status                                                                                 |                                             | 0                   |             | 1                         |            | 0                            |  |
|                                                                                                | No                                          | 59 (59%)            | 71 (71.7%)  |                           | 60 (60%)   |                              |  |
|                                                                                                | Current smoker                              | 16 (16%)            | 13 (13.1%)  |                           | 12 (12%)   |                              |  |
|                                                                                                | Former smoker                               | 25 (25%)            | 15 (15.2%)  |                           | 28 (28%)   |                              |  |
| Diet high in purine and/or fructose                                                            | 43 (57.3%)                                  | 25                  | 36 (43.9%)  | 18                        | 37 (41.1%) | 10                           |  |
| Practice of regular physical activity                                                          | 8 (10%)                                     | 20                  | 17 (20.5%)  | 17                        | 6 (7.1%)   | 16                           |  |
| Rheumatologic and non-rheumatologic comorbidities                                              |                                             |                     |             |                           |            |                              |  |
| Osteoarthritis                                                                                 | 23 (23%)                                    | 0                   | 17 (17%)    | 0                         | 32 (32%)   | 0                            |  |
| Diabetes mellitus                                                                              | 32 (32%)                                    | 0                   | 25 (25.3%)  | 1                         | 27 (27%)   | 0                            |  |
| High blood pressure                                                                            | 71 (71%)                                    | 0                   | 46 (46.5%)  | 1                         | 64 (64%)   | 0                            |  |
| History of major cardiovascular event (stroke, myocardial infarction, lower limb arteriopathy) | 21 (21%)                                    | 0                   | 17 (17.1%)  | 1                         | 28 (28%)   | 0                            |  |
| Congestive heart failure                                                                       | 14 (14%)                                    | 0                   | 8 (8.1%)    | 1                         | 16 (16%)   | 0                            |  |

|                                                                                  |               |    |               |    |               |    |
|----------------------------------------------------------------------------------|---------------|----|---------------|----|---------------|----|
| Dyslipidaemia                                                                    | 30 (30%)      | 0  | 21<br>(21.2%) | 1  | 49 (49%)      | 0  |
| Liver disease                                                                    | 2 (2%)        | 0  | 5 (5.1%)      | 1  | 49 (49%)      | 0  |
| Obesity (body mass index > 30 kg/m <sup>2</sup> )                                | 31<br>(37.3%) | 17 | 18 (24%)      | 25 | 25<br>(28.1%) | 11 |
| Family history of <sup>d</sup>                                                   |               | 0  |               | 0  |               | 0  |
| <i>Gout (first or second degree)</i>                                             | 5 (5%)        |    | 26 (26%)      |    | 24 (24%)      |    |
| <i>Renal colic (first or second degree)</i>                                      | 0 (0%)        |    | 4 (4%)        |    | 1 (1%)        |    |
| <i>Hyperuricaemia (first or second degree)</i>                                   | 0 (0%)        |    | 2 (2%)        |    | 0 (0%)        |    |
| <b>Background treatments for comorbidities</b>                                   |               |    |               |    |               |    |
| ≥2 hyper-uricaemic treatments <sup>e</sup>                                       | 56 (56%)      | 0  | 34<br>(34.3%) | 1  | 36 (36%)      | 0  |
| ≥2 hypo-uricaemic treatments <sup>f</sup>                                        | 36 (36%)      | 0  | 21<br>(21.2%) | 1  | 21 (21%)      | 0  |
| End-stage kidney failure treatment (dialysis, kidney transplant)                 | 2 (2%)        | 0  | 2 (2%)        | 1  | 0 (0%)        | 0  |
| <b>Gout characteristics</b>                                                      |               |    |               |    |               |    |
| Gout duration (years)                                                            | 3.1 ± 5.7     | 9  | 5.9 ± 8.8     | 2  | 8.3 ± 9.7     | 3  |
| Number of flares in the 6 months before baseline                                 | 1 [1 ; 2]     | 5  | 1 [1 ; 2]     | 5  | 1 [1 ; 3]     | 8  |
| At least one gout complication at baseline                                       | 84 (84%)      | 0  | 68 (68%)      | 0  | 77 (77%)      | 0  |
| If yes, type <sup>d</sup>                                                        |               | 0  |               | 0  |               | 0  |
| <i>Ultrasound or subcutaneous tophi</i>                                          | 45<br>(53.6%) |    | 36<br>(52.9%) |    | 63<br>(81.8%) |    |
| <i>Renal lithiasis on imaging and/or renal colic</i>                             | 2 (2.4%)      |    | 11<br>(16.2%) |    | 22<br>(28.6%) |    |
| <i>Chronic kidney disease (CKD 3 and above)</i>                                  | 60<br>(71.4%) |    | 37<br>(54.4%) |    | 31<br>(40.3%) |    |
| <i>Gouty arthropathy</i>                                                         | 15<br>(17.9%) |    | 21<br>(30.9%) |    | 22<br>(28.6%) |    |
| On-going urate lowering therapy (ULT)                                            | 17 (17%)      | 0  | 31 (31%)      |    | 33 (33%)      | 0  |
| If yes, ULT drug                                                                 |               | 0  |               | 0  |               | 0  |
| <i>Allopurinol</i>                                                               | 8 (47.1%)     |    | 16<br>(51.6%) |    | 21<br>(63.3%) |    |
| <i>Febuxostat</i>                                                                | 9 (52.9%)     |    | 14<br>(45.2%) |    | 11<br>(33.3%) |    |
| <i>Benzobromarone, Probenecid</i>                                                | 0 (0%)        |    | 1 (3.2%)      |    | 1 (3%)        |    |
| <i>Lesinurad</i>                                                                 | 0 (0%)        |    | 0 (0%)        |    | 0 (0%)        |    |
| <i>Rasburicase, Pegloticase</i>                                                  | 0 (0%)        |    | 0 (0%)        |    | 0 (0%)        |    |
| <i>Bitherapy</i>                                                                 | 0 (0%)        |    | 0 (0%)        |    | 0 (0%)        |    |
| Serum urate level (mg/dL)                                                        | 84.5 ± 23.5   | 5  | 80.6 ± 24.2   | 8  | 80.3 ± 23.4   | 4  |
| First visit context:                                                             |               | 0  |               | 0  |               | 0  |
| <i>Out-patient referral</i>                                                      | 32 (32%)      |    | 92 (92%)      |    | 66 (66%)      |    |
| <i>In-hospital care</i>                                                          | 68 (68%)      |    | 8 (8%)        |    | 34 (34%)      |    |
| Patient specifically referred to expert centre                                   | 79 (79%)      | 0  | 39 (39%)      | 0  | 60 (60%)      | 0  |
| If yes, reason                                                                   |               | 0  |               | 0  |               | 0  |
| <i>From primary care for treatment initiation</i>                                | 4 (5.1%)      |    | 1 (2.6%)      |    | 4 (6.7%)      |    |
| <i>From another hospital department for gout management</i>                      | 68<br>(86.1%) |    | 30<br>(76.9%) |    | 42 (70%)      |    |
| <i>Non-control at a submaximal dose of ULT in primary care</i>                   | 0 (0%)        |    | 3 (7.7%)      |    | 5 (8.3%)      |    |
| <i>Non-control at a maximal dose of ULT in primary care</i>                      | 1 (1.3%)      |    | 2 (5.1%)      |    | 2 (2.3%)      |    |
| <i>Non-control with non-referred management</i>                                  | 0 (0%)        |    | 0 (0%)        |    | 1 (1.7%)      |    |
| <i>For initial hospital prescription</i>                                         | 0 (0%)        |    | 0 (0%)        |    | 1 (1.7%)      |    |
| <i>Already follow in the expert centre for another rheumatological pathology</i> | 5 (6.3%)      |    | 1 (2.6%)      |    | 3 (5%)        |    |
| <i>From primary care, for diagnosis re-evaluation</i>                            | 1 (1.3%)      |    | 0 (0%)        |    | 1 (1.7%)      |    |

|                                                                                                                      |        |          |          |
|----------------------------------------------------------------------------------------------------------------------|--------|----------|----------|
| From primary care, for re-evaluation because of tolerance difficulties to standard ULT                               | 0 (0%) | 0 (0%)   | 1 (1.7%) |
| For personal convenience                                                                                             | 0 (0%) | 2 (5.1%) | 0 (0%)   |
| Mean $\pm$ SD, median [Q1;Q3], n (%).                                                                                |        |          |          |
| <sup>a</sup> Missing values (n)                                                                                      |        |          |          |
| <sup>b</sup> More than 21 units of alcohol per week in men, and more than 14 per week in women (OMS recommendations) |        |          |          |
| <sup>c</sup> At least one serving per day [17]                                                                       |        |          |          |
| <sup>d</sup> Multiple choice                                                                                         |        |          |          |
| <sup>e</sup> Beta-blocker, diuretics, aspirin                                                                        |        |          |          |
| <sup>f</sup> Losartan, calcium channel blocker, atorvastatin, fenofibrate, ezetimibe                                 |        |          |          |

**Table S2:** Lost to follow-up patients characteristics.

| Baseline characteristics of patients lost to follow-up just after baseline (M0) |                                   |                  |             |            |
|---------------------------------------------------------------------------------|-----------------------------------|------------------|-------------|------------|
|                                                                                 | Effective (n, %) or mean $\pm$ SD |                  |             |            |
| Baseline meeting context (%)                                                    |                                   |                  |             |            |
|                                                                                 | Consultation                      | 32 (48.5%)       |             |            |
|                                                                                 | Hospitalization                   | 34 (51.5%)       |             |            |
| Age at inclusion (years)                                                        |                                   | 63.6 $\pm$ 13.4  |             |            |
| Age at gout diagnosis (years)                                                   |                                   | 59.7 $\pm$ 15.5  |             |            |
| Duration of disease before inclusion (years)                                    |                                   | 4.2 $\pm$ 6.6    |             |            |
| Gout flares over the last 6 months before inclusion                             |                                   | 1.9 $\pm$ 2.4    |             |            |
| M0 uricemia (mg/L)                                                              |                                   | 8.09 $\pm$ 2.54  |             |            |
| Gout complications already present before M0                                    |                                   | 1 $\pm$ 0.8      |             |            |
| Number of extra-rheumatologic comorbidities                                     |                                   | 1.8 $\pm$ 1.5    |             |            |
| ULT prescribed at the end of the M0 consultation                                |                                   | 57 (86.4%)       |             |            |
|                                                                                 | Allopurinol                       | 24 (42.9%)       |             |            |
|                                                                                 | Febuxostat                        | 32 (57.1%)       |             |            |
| Reason for not attending a visit in the follow-up                               |                                   |                  |             |            |
|                                                                                 | M6                                | Effective (n, %) | M12         | M24        |
| Visit status                                                                    |                                   |                  |             |            |
| - honored                                                                       | 205 (68.3%)                       | 161 (53.7%)      | 122 (40.7%) |            |
| - non-honoured                                                                  | 95 (31.7%)                        | 139 (46.3%)      | 178 (59.3%) |            |
|                                                                                 | CH Saint Philibert                | 14 (14.7%)       | 37 (26.6%)  | 52 (29.2%) |
|                                                                                 | CHU Bichat                        | 47 (49.5%)       | 60 (43.1%)  | 78 (43.8%) |
|                                                                                 | CHU Lariboisière                  | 34 (35.8%)       | 42 (30.2%)  | 48 (27.0%) |
| If non-honoured, reason:                                                        |                                   |                  |             |            |
| - unknown                                                                       | 62 (65.3%)                        | 79 (56.8%)       | 114 (64%)   |            |
| - patient's decision                                                            | 10 (10.5%)                        | 10 (7.2%)        | 12 (6.7%)   |            |
| - voluntary non-recall from the rheumatologist                                  | 11 (11.6%)                        | 27 (19.4%)       | 25 (14%)    |            |
| - intercurrent health problem                                                   | 12 (12.6%)                        | 23 (16.5%)       | 24 (13.5%)  |            |
| - death                                                                         | 0 (0%)                            | 0 (0%)           | 3 (1.7%)    |            |

M0: baseline; ULT: urate lowering therapy.

**Table S3:** Subgroup analysis to compare the "lost to follow-up just after baseline" to the "lost after at least two consultations" patients profile (n = 300).

|                                                                                 | <b>Missing data (n)</b> | <b>"lost to follow-up" after M0 (n = 66)</b> | <b>M0 and at least one another consultation (n = 234)</b> | <b>p-value</b> |
|---------------------------------------------------------------------------------|-------------------------|----------------------------------------------|-----------------------------------------------------------|----------------|
| ULT prescribed at the end of the M0 consultation (n, %)                         | 0                       | 57 (86.4%)                                   | 197 (84.2%)                                               | 0.81           |
| <i>Allopurinol</i>                                                              |                         | 24 (42.9%)                                   | 102 (53.1%)                                               | 0.23           |
| <i>Febuxostat</i>                                                               |                         | 32 (57.1%)                                   | 90 (46.9%)                                                |                |
| M0 meeting context (n, %)                                                       | 0                       |                                              |                                                           | <b>0.0072</b>  |
| <i>Consultation</i>                                                             |                         | 32 (48.5%)                                   | 158 (67.5%)                                               |                |
| <i>Hospitalization</i>                                                          |                         | 34 (51.5%)                                   | 90 (46.9%)                                                |                |
| Age at inclusion (y), <i>mean ± SD</i>                                          | 0                       | 63.6 ± 13.4                                  | 61.8 ± 15.7                                               | 0.61           |
| Age at gout diagnosis (y), <i>mean ± SD</i>                                     | 13                      | 59.7 ± 15.5                                  | 55 ± 17.6                                                 | 0.056          |
| Duration of disease before inclusion (y), <i>mean ± SD</i>                      | 14                      | 4.2 ± 6.6                                    | 6.3 ± 9                                                   | <b>0.02</b>    |
| Number of gout flares over the last 6 months before inclusion, <i>mean ± SD</i> | 18                      | 1.9 ± 2.4                                    | 2.2 ± 2.8                                                 | 0.39           |
| M0 uricemia (mg/dL), <i>mean ± SD</i>                                           | 17                      | 8.09 ± 2.54                                  | 8.21 ± 2.33                                               | 0.75           |
| Gout complications before M0 <sup>a</sup> , <i>mean ± SD</i>                    | 0                       | 1 ± 0.8                                      | 1.2 ± 1                                                   | 0.21           |
| Extra-rheumatologic comorbidities <sup>b</sup> , <i>mean ± SD</i>               | 1                       | 1.8 ± 1.5                                    | 1.6 ± 1.4                                                 | 0.51           |

<sup>a</sup> Ultrasound or subcutaneous tophi, renal lithiasis on imaging and/or renal colic, chronic kidney disease (CKD 3 and above), gouty arthropathy.

<sup>b</sup> Diabetes mellitus, high blood pressure, history of major cardiovascular event (stroke, myocardial infarction, lower limb arteriopathy), congestive heart failure, dyslipidaemia, liver disease, obesity.
